# Supplementary material for: Synthesis and photovoltaic properties of new conjugated polymers based on syn- and anti-benzodifuran
Source: Royal Society of Chemistry journal article supplement (doi:10.1039/c2py20504a), 2012-01-01
Supplement: c2py20504a.pdf [file c2py20504a.pdf]

*Electronic Supplementary Material*

## **Synthesis and photovoltaic properties of new conjugated polymers based on *syn-* and *anti*-benzodifuran**

Chao Hu,<sup>a</sup> Yingying Fu,<sup>b</sup> Shugang Li,<sup>a</sup> Zhiyuan Xie,<sup>\*,b</sup> Qing Zhang<sup>\*,a</sup>

<sup>a</sup> Department of Polymer Science and Engineering, School of Chemistry and Chemical Engineering, Shanghai Jiaotong University, Shanghai 200240, China

<sup>b</sup> State Key Laboratory of Polymer Physics and Chemistry, Changchun Institute of Applied Chemistry, Chinese Academy of Science, Changchun 130022, China

### **Contents**

#### **1. Characterization**

*a) Nuclear Magnetic Resonance (NMR) spectra*

*b) TGA curves*

*c) DSC thermograms*

*d) Cyclic Voltammograms*

## 1. Characterization

### a) NMR spectra of monomers and polymers

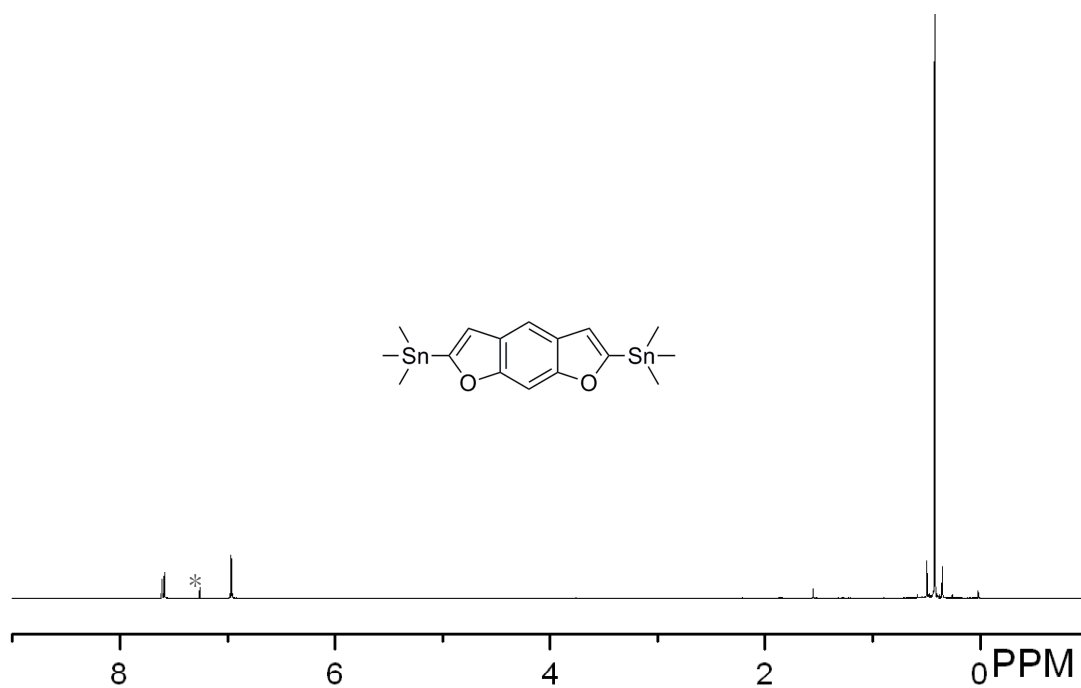

**Fig. S1**  $^1\text{H}$  NMR spectrum of compound **1** in  $\text{CDCl}_3$ .

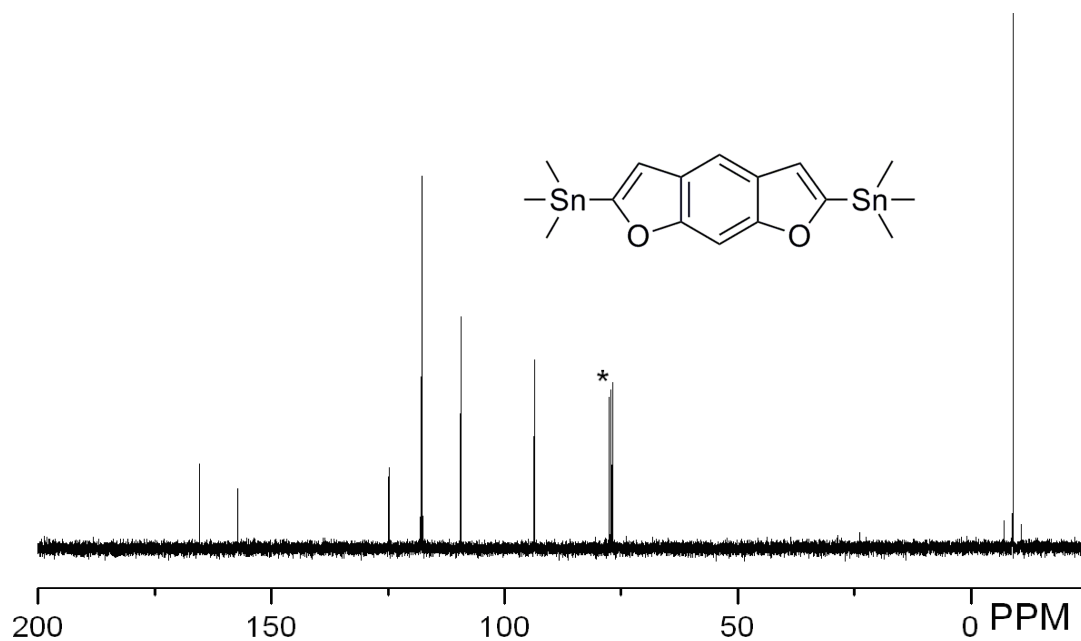

**Fig. S2**  $^{13}\text{C}$  NMR spectrum of compound **1** in  $\text{CDCl}_3$ .

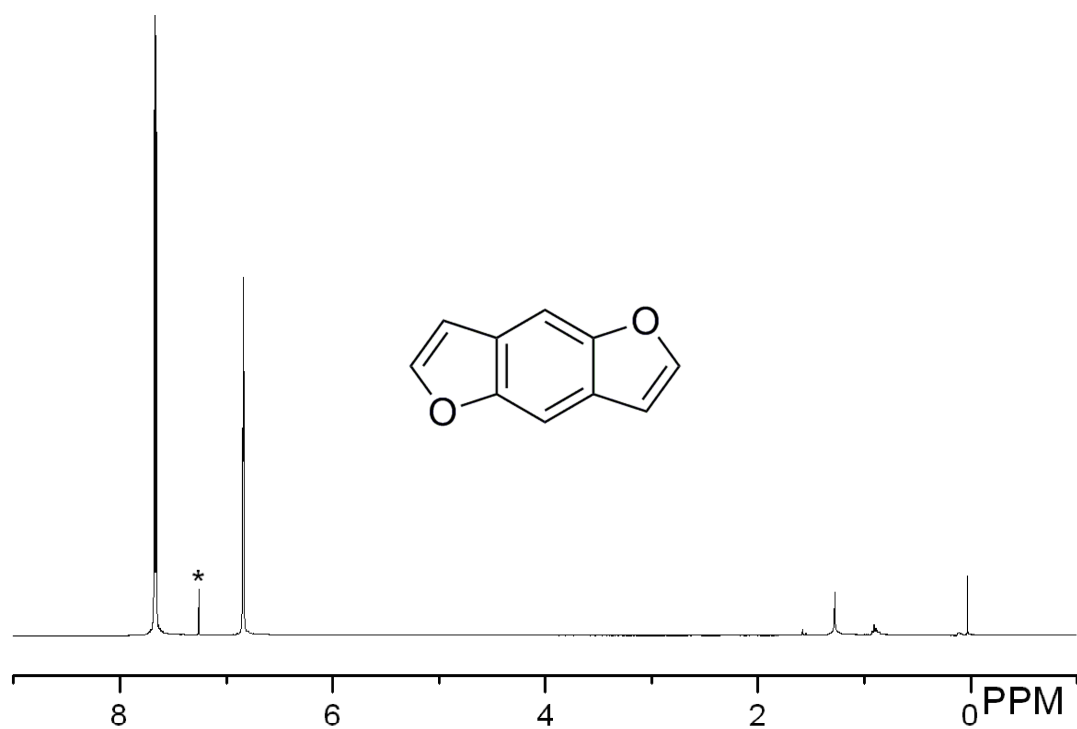

**Fig. S3**  $^1\text{H}$  NMR spectrum of compound **2** in  $\text{CDCl}_3$ .

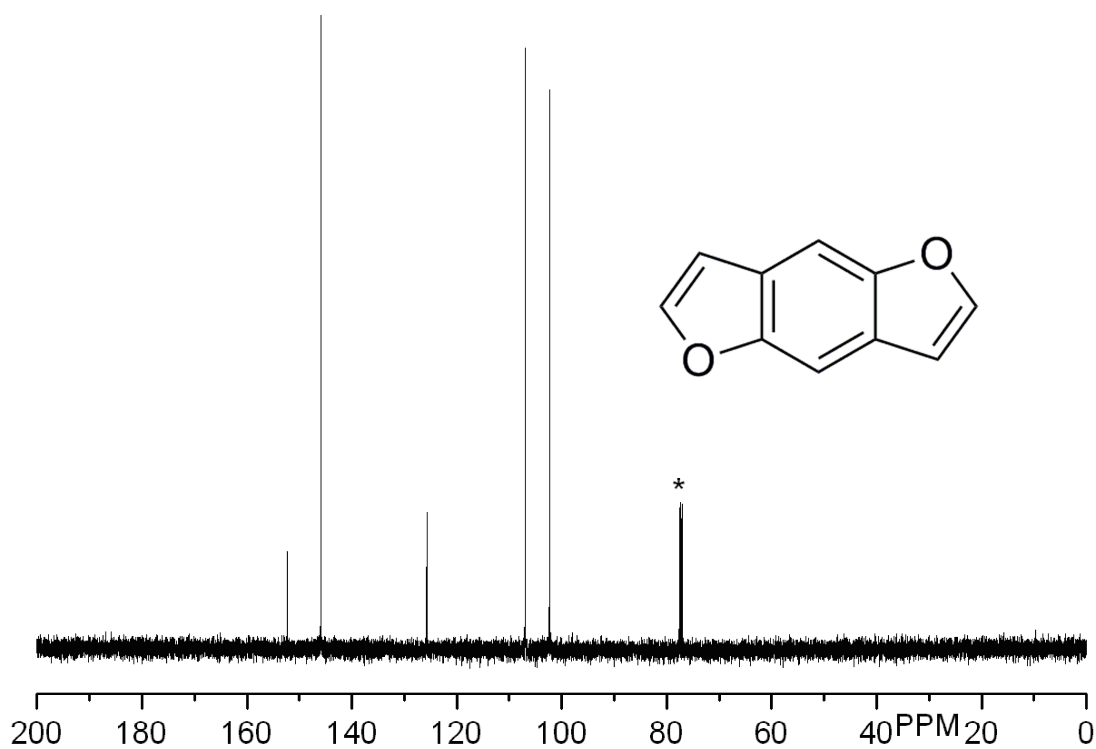

**Fig. S4**  $^{13}\text{C}$  NMR spectrum of compound **2** in  $\text{CDCl}_3$ .

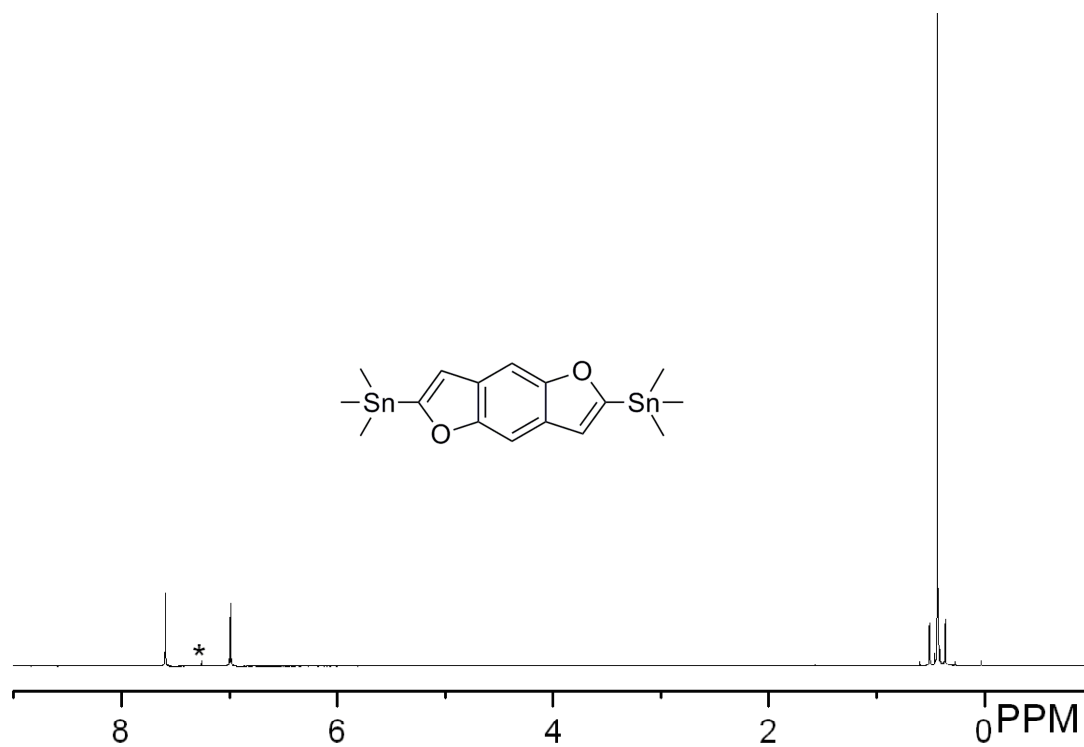

Fig. S5 <sup>1</sup>H NMR spectrum of compound 3 in CDCl<sub>3</sub>.

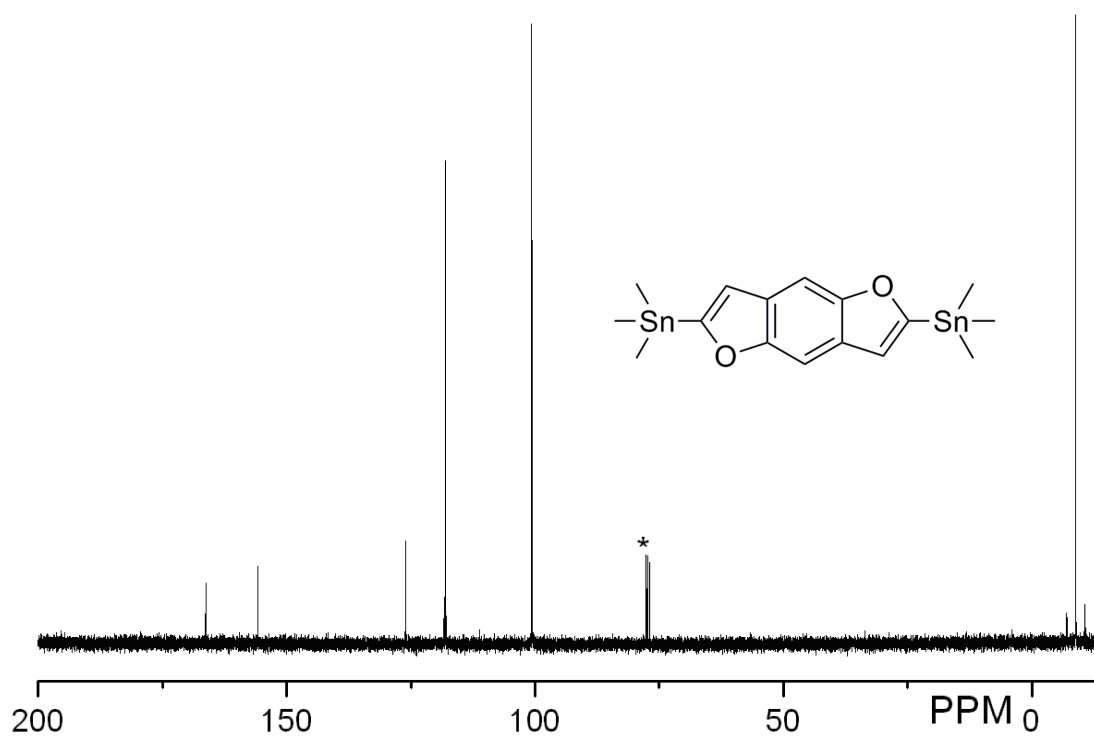

Fig. S6 <sup>13</sup>C NMR spectrum of compound 3 in CDCl<sub>3</sub>.

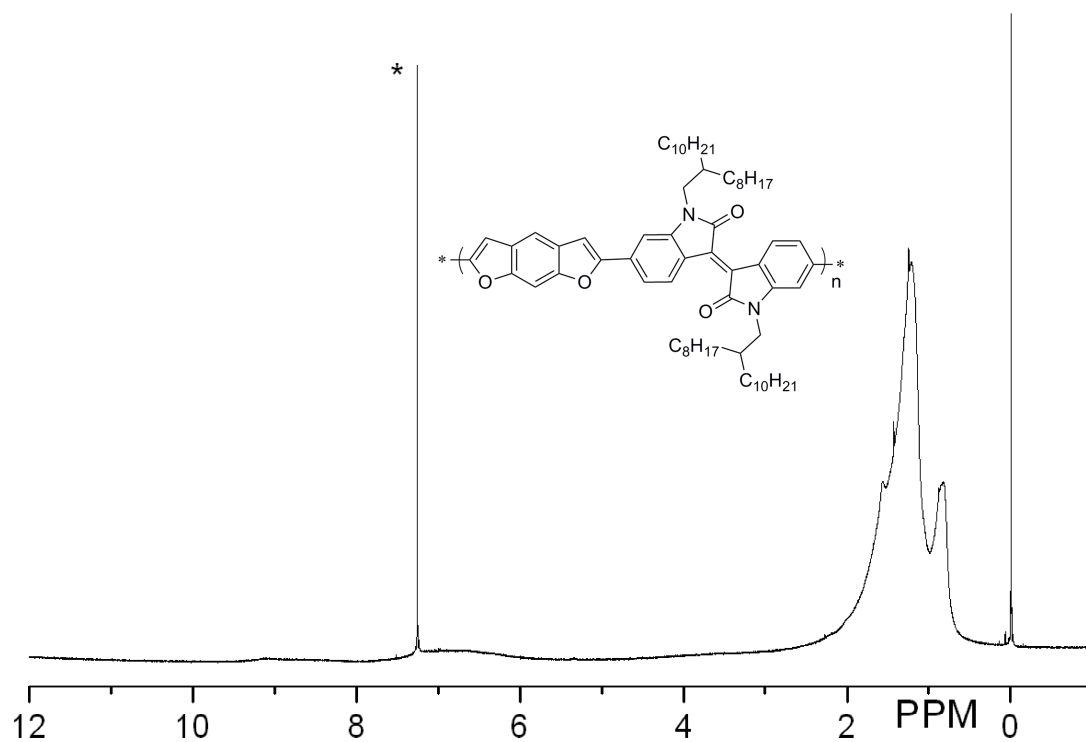

Fig. S7 <sup>1</sup>H NMR spectrum of *syn*-PBDFID in CDCl<sub>3</sub>.

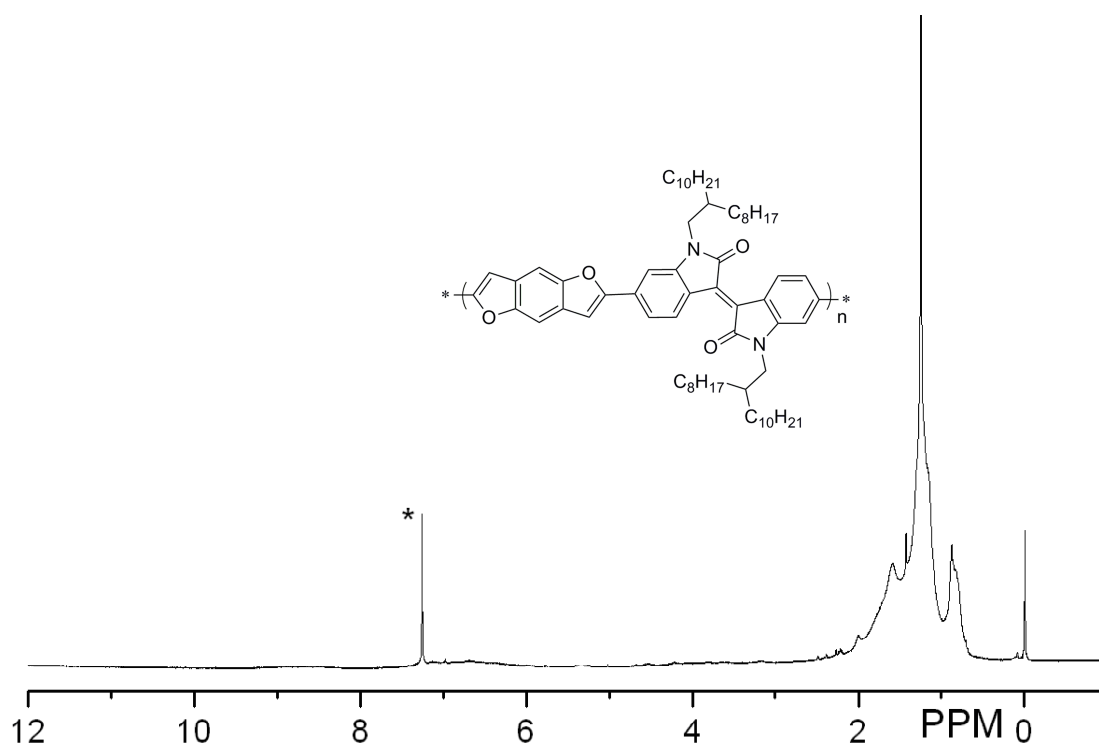

Fig. S8 <sup>1</sup>H NMR spectrum of *anti*-PBDFID in CDCl<sub>3</sub>.

b) TGA curves

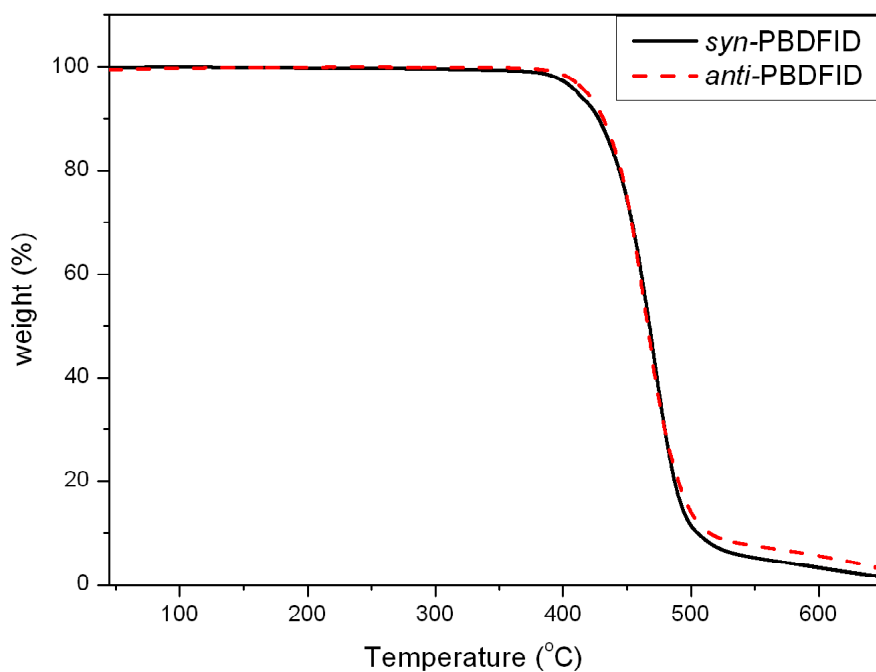

**Fig. S9** The TGA plots of polymers.

c) DSC thermograms

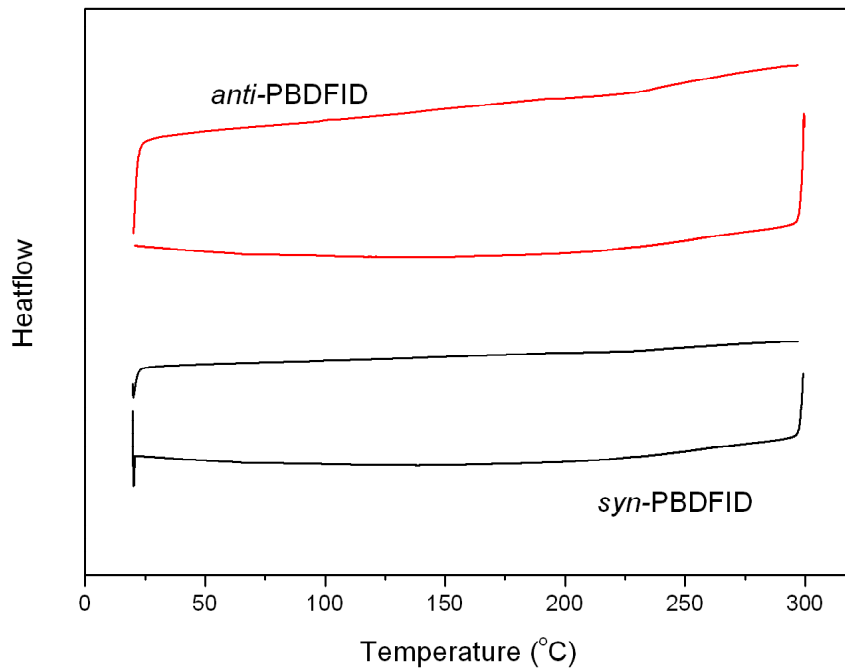

**Fig. S10.** DSC thermograms during the first heating and cooling scans.

d) Cyclic voltammograms

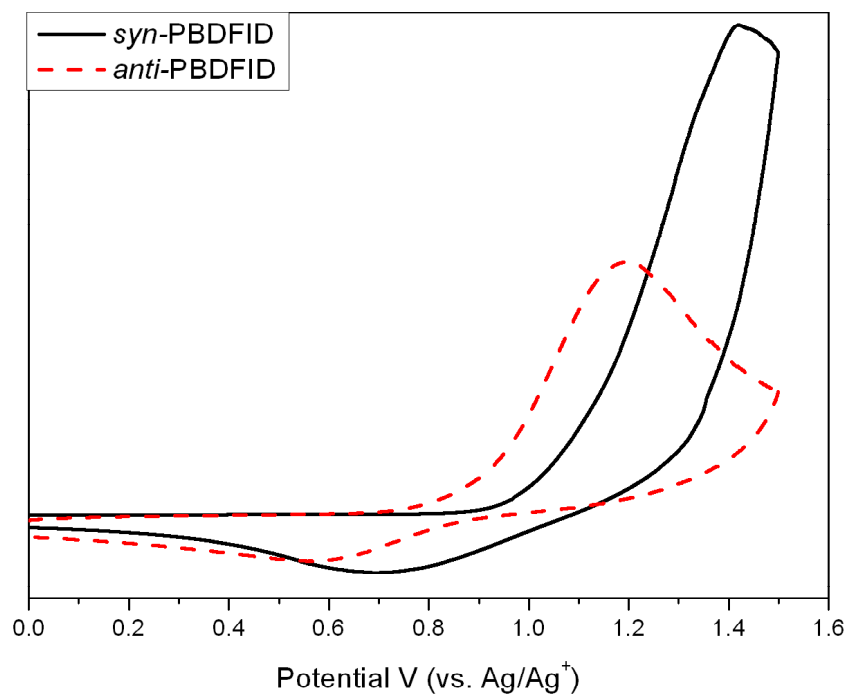

**Fig. S11** Cyclic voltammograms of *syn*-PBDFID and *anti*-PBDFID films in acetonitrile/0.1 M [*n*-Bu<sub>4</sub>N]<sup>+</sup>[PF<sub>6</sub>]<sup>-</sup> with scan rate of 100 mV/s.
